# Supplementary material for: Reversed crystal growth of metal organic framework MIL-68(In)
Source: Royal Society of Chemistry journal article supplement (doi:10.1039/d1ce01120k), 2021-01-01
Supplement: d1ce01120k1.pdf [file d1ce01120k1.pdf]

## Electronic supplementary information

### Reversed Crystal Growth of Metal Organic Framework MIL-68(In)

Kirsty McRoberts and Wuzong Zhou

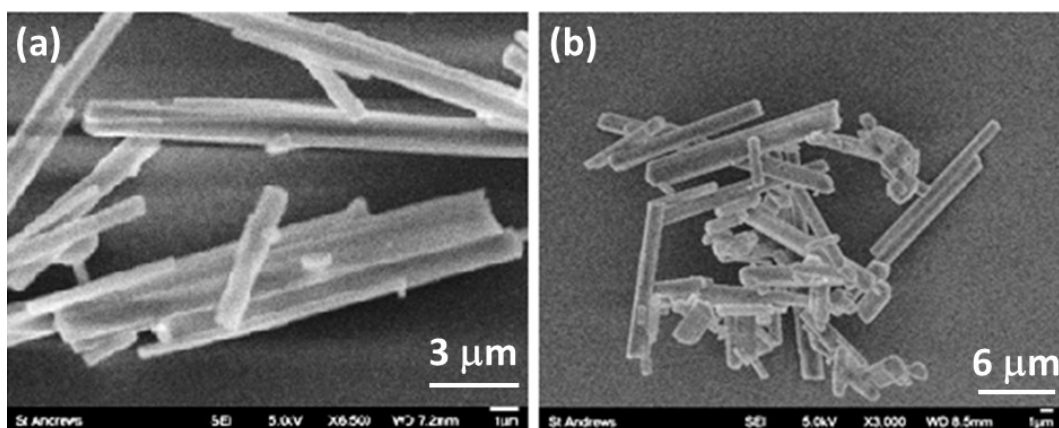

**Fig. S1** SEM images of hexagonal microrods of MIL-68(In) with reaction times (a) 168 and (b) 340 h.
